# Supplementary material for: Compact light field photography towards versatile three-dimensional vision
Source: PubMed Central journal article supplement (PMC9184585; doi:10.1038/s41467-022-31087-9), 2022-06-09
Supplement: 41467_2022_31087_MOESM3_ESM.pdf [file 41467_2022_31087_MOESM3_ESM.pdf]

### **Description of Additional Supplementary Files**

File Name: Supplementary Movie 1

Description: Dynamic 3D imaging through occlusions Supplementary

File Name: Supplementary Movie 2

Description: Video-rate flash LiDAR imaging of a simple scene

File Name: Supplementary Movie 3

Description: Video-rate flash LiDAR imaging of a complex scene
